# Supplementary material for: Multidimensional crystal frameworks based on heteropoly blue building block of [SiW10MoV2O40]6−: synthesis, structures and magnetic properties
Source: Royal Society of Chemistry journal article supplement (doi:10.1039/c3dt32658f), 2013-01-01
Supplement: c3dt32658f.pdf [file c3dt32658f.pdf]

## Supporting Information

### *S1. IR spectra*

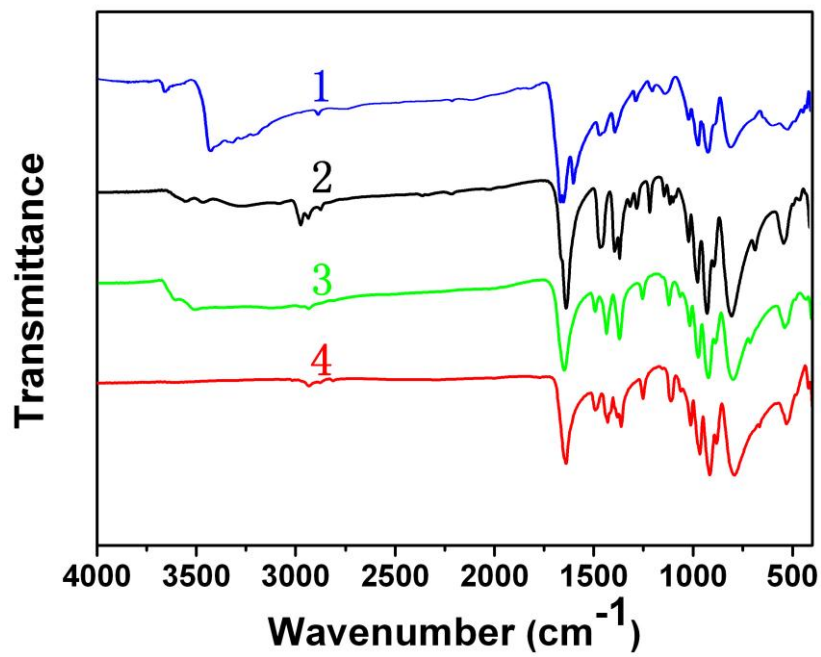

Figure S1. IR spectra of 1-4.

## S2. Thermogravimetry (TG) curve

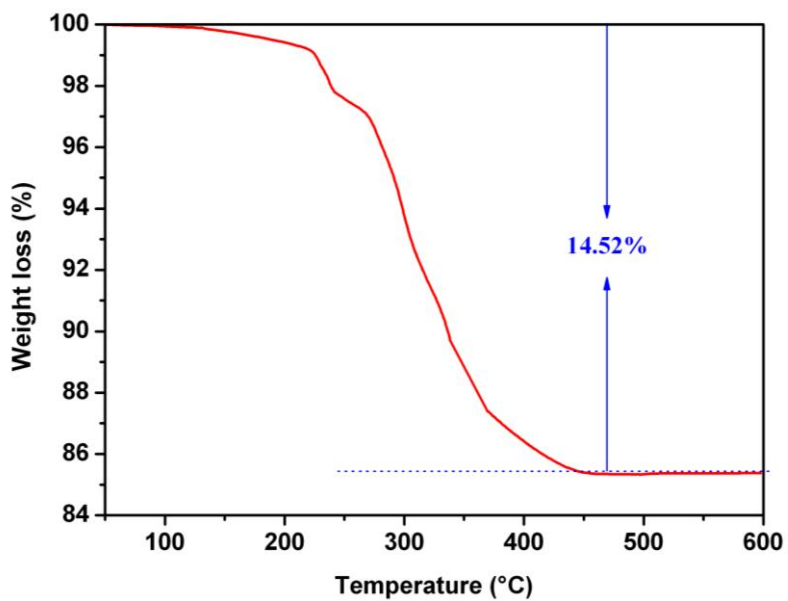

Figure S2-1. Thermogravimetry (TG) curve of **1**.

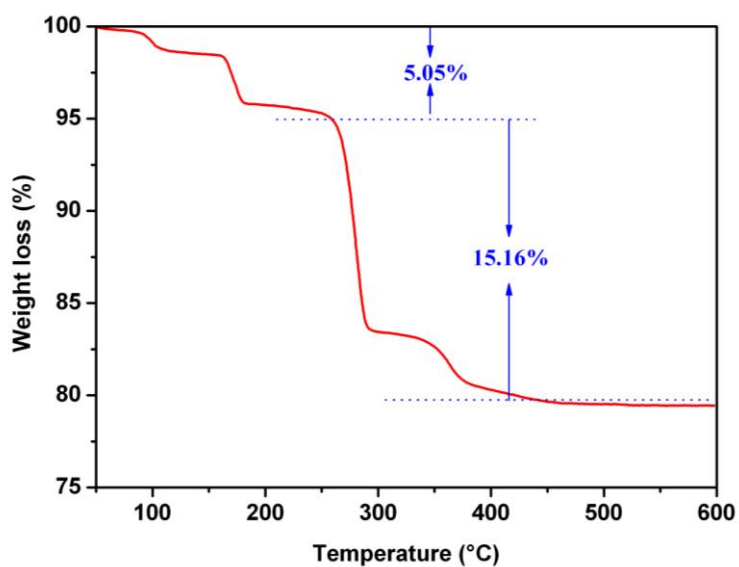

Figure S2-2. Thermogravimetry (TG) curve of **2**.

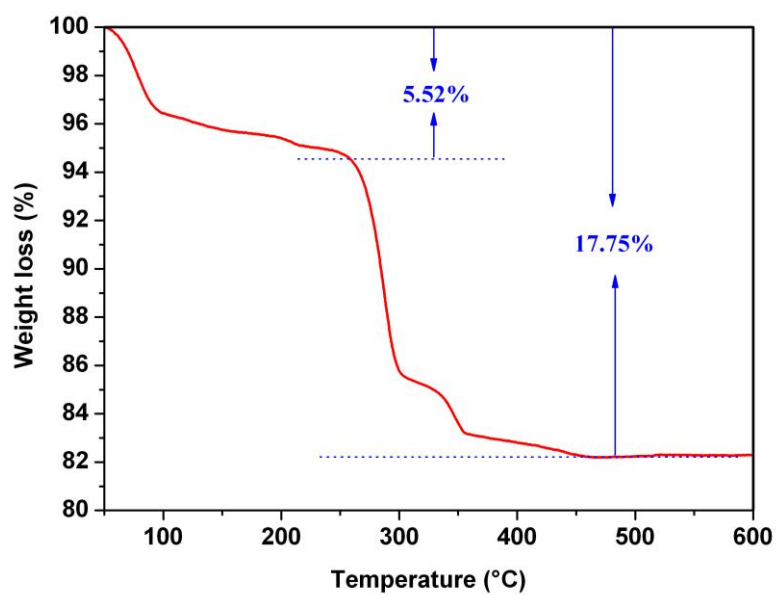

Figure S2-3. Thermogravimetry (TG) curve of **3**.

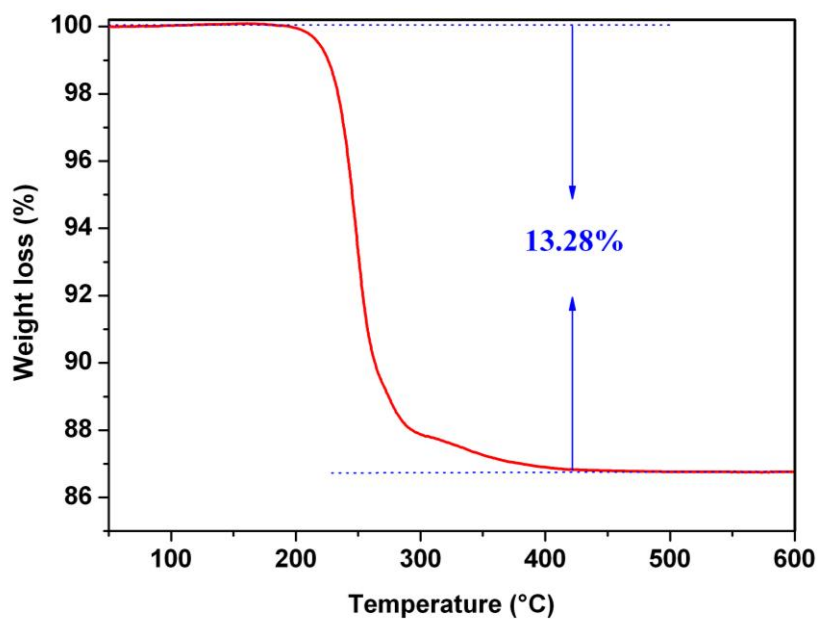

Figure S2-4. Thermogravimetry (TG) curve of **4**.

### S3. X-ray powder diffraction

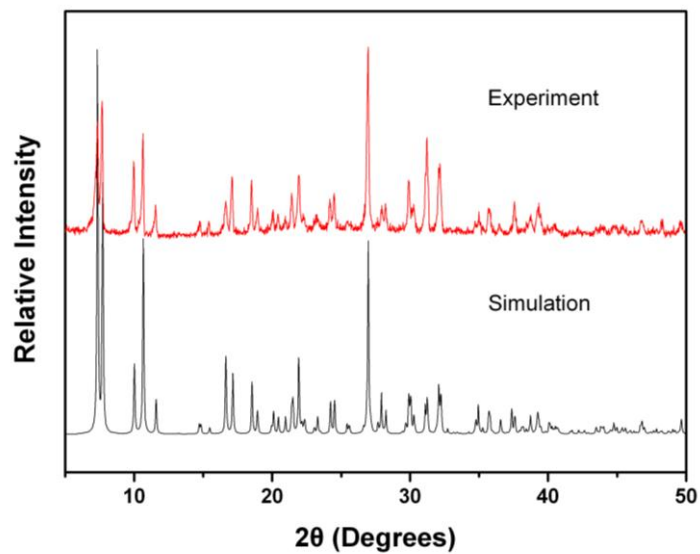

Figure S3-1. XRD patterns of compound 1.

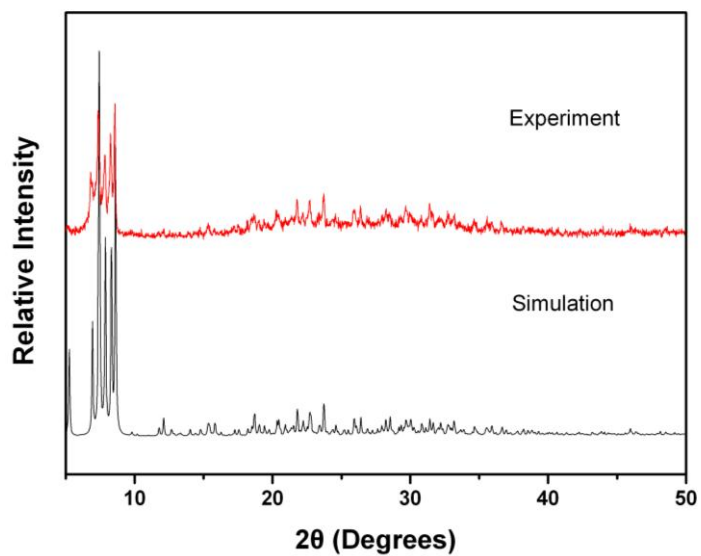

Figure S3-2. XRD patterns of compound 2.

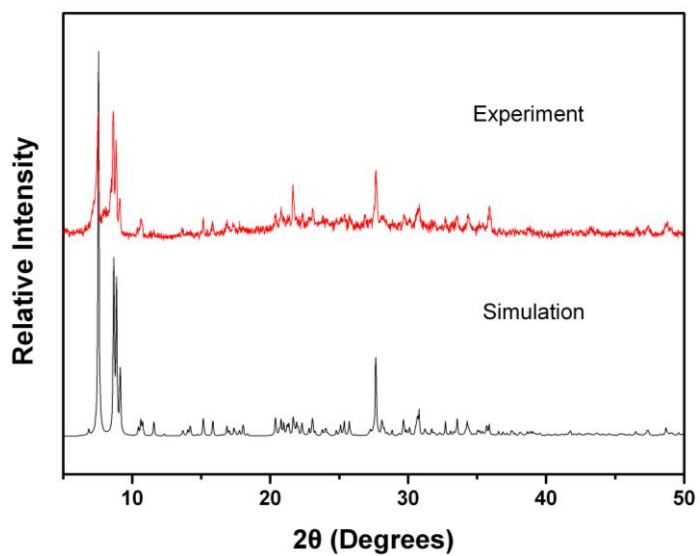

Figure S3-3. XRD patterns of compound **3**.

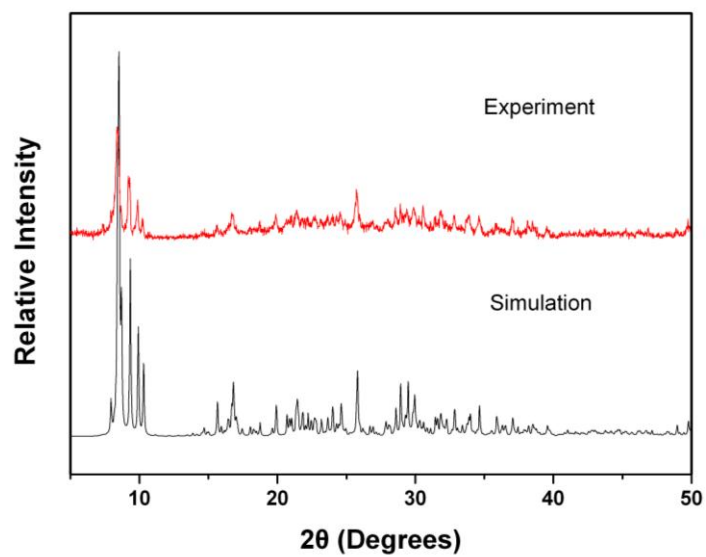

Figure S3-4. XRD patterns of compound **4**.

#### *S4. Electron paramagnetic resonance (ESR) spectra*

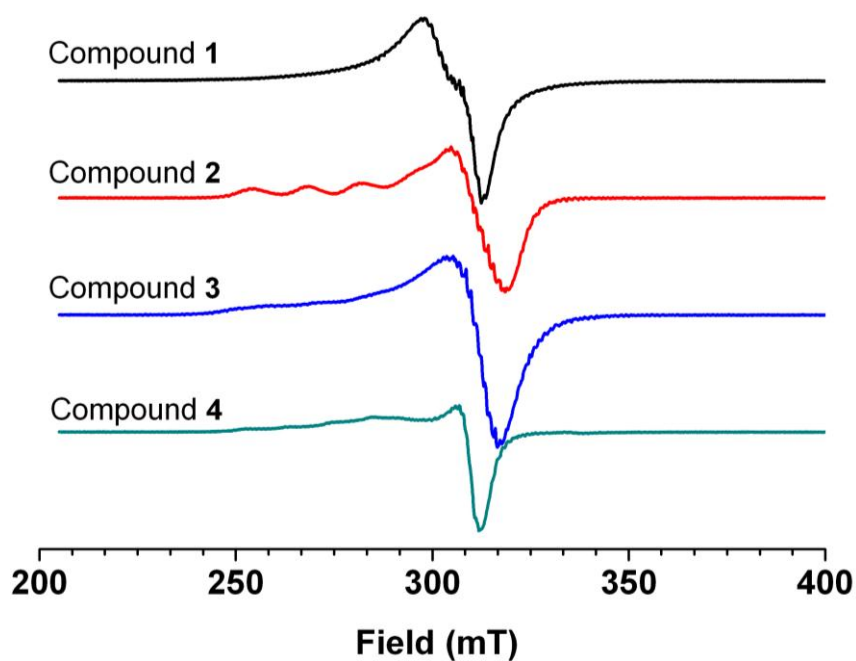

Figure S4. The ESR spectra for powdered samples of **1-4**.

#### *S5&S6. UV/Vis spectra stability studies of 1-4.*

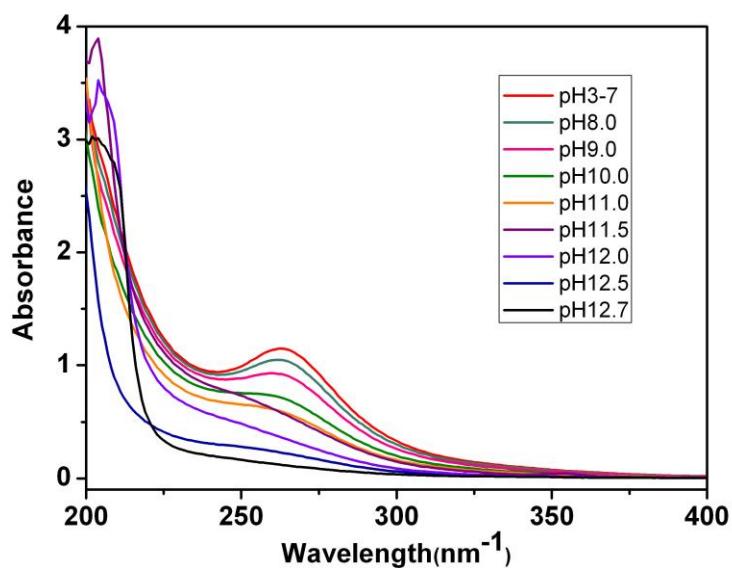

Figure S5-1. UV/Vis spectra of **1** in aqueous solution at different pH.

The pH was adjusted in the range of 3-7 by addition of aqueous HCl and 7-12.7 by addition of NaOH

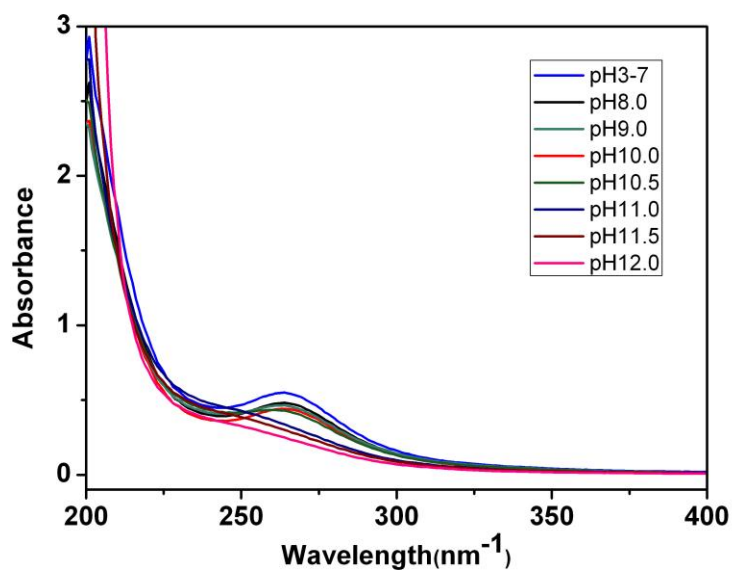

Figure S5-2. UV/Vis spectra of **2** in aqueous solution at different pH.

The pH was adjusted in the range of 3-7 by addition of aqueous HCl and 7-12 by addition of NaOH

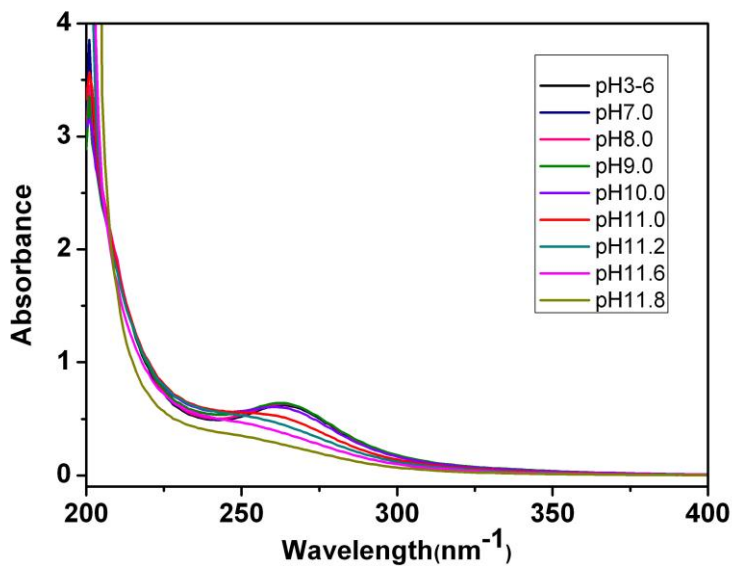

Figure S5-3. UV/Vis spectra of **3** in aqueous solution at different pH.

The pH was adjusted in the range of 3-7 by addition of aqueous HCl and 7-11.8 by addition of NaOH

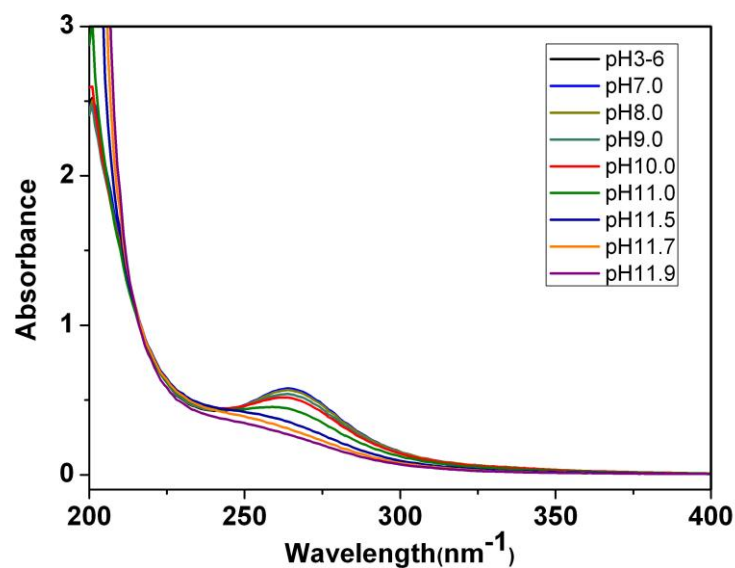

Figure S5-4. UV/Vis spectra of **4** in aqueous solution at different pH.

The pH was adjusted in the range of 3-7 by addition of aqueous HCl and 7-11.9 by addition of NaOH

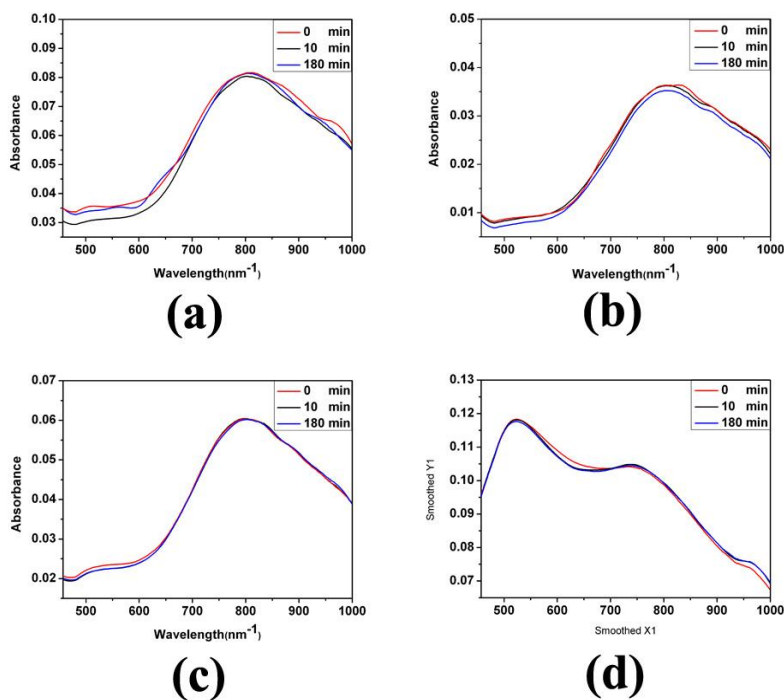

Figure S6. UV/Vis spectra of **1-4** in aqueous solution.

Excess of Oxygen were bubbled through the stirred solution and the UV spectrum was detected after 0 min, 10 min and 180 minutes (the characteristic peak is located at 264 nm), respectively.



## Figure S7. \_platon\_squeeze\_details

There is a big solvent accessible void present in the structure of 0D, 1D and 2D. QUEEZE has been used; SQUEEZE results were listed as follow:

0D:

```
loop_  
_platon_squeeze_void_nr  
_platon_squeeze_void_average_x  
_platon_squeeze_void_average_y  
_platon_squeeze_void_average_z  
_platon_squeeze_void_volume  
_platon_squeeze_void_count_electrons  
_platon_squeeze_void_content  
1 0.000 0.000 0.500 68 3 ''  
2 0.500 0.500 0.500 68 3''
```

1D:

```
loop_  
_platon_squeeze_void_nr  
_platon_squeeze_void_average_x  
_platon_squeeze_void_average_y  
_platon_squeeze_void_average_z  
_platon_squeeze_void_volume  
_platon_squeeze_void_count_electrons  
_platon_squeeze_void_content  
1 -0.009 0.000 0.000 743 33 ''  
2 -0.007 0.500 0.500 743 33 ''
```

2D:

```
loop_  
_platon_squeeze_void_nr  
_platon_squeeze_void_average_x  
_platon_squeeze_void_average_y  
_platon_squeeze_void_average_z  
_platon_squeeze_void_volume  
_platon_squeeze_void_count_electrons  
_platon_squeeze_void_content  
1 0.500 0.057 0.500 123 68 ''  
2 0.500 0.324 0.000 111 60 ''  
3 1.000 0.557 0.500 122 68 ''  
4 0.000 0.824 0.000 111 60 ''
```
